# 1 **Geographical validation of the Smart Triage Model by age group**

2 Cherri Zhang<sup>1\*</sup>, Matthew O Wiens<sup>1,2,3</sup>, Dustin Dunsmuir<sup>1,3</sup>, Yashodani Pillay<sup>1</sup>, Charly Huxford<sup>1</sup>,  
3 David Kimutai<sup>4</sup>, Emmanuel Tenywa<sup>5</sup>, Mary Ouma<sup>4</sup>, Joyce Kigo<sup>6</sup>, Stephen Kamau<sup>6</sup>, Mary Chege<sup>7</sup>,  
4 Nathan Kenya-Mugisha<sup>8</sup>, Savio Mwaka<sup>8</sup>, Guy A Dumont<sup>2,3,9</sup>, Niranjana Kissoon<sup>3,10</sup>, Samuel Akech<sup>6</sup>,  
5 J Mark Ansermino<sup>1,2,3</sup>, and on behalf of the Pediatric Sepsis CoLab

6 <sup>1</sup> Institute for Global Health, BC Children's and Women's Hospitals, Vancouver, British Columbia, Canada

7 <sup>2</sup> Department of Anaesthesiology, Pharmacology & Therapeutics, University of British Columbia,  
8 Vancouver, British Columbia, Canada

9 <sup>3</sup> BC Children's Hospital Research Institute, Vancouver, British Columbia, Canada

10 <sup>4</sup> Mbagathi County Hospital, Nairobi, Kenya

11 <sup>5</sup> Jinja Regional Referral Hospital, Jinja, Uganda

12 <sup>6</sup> Health Services Unit, KEMRI-Wellcome Trust Research Program, Nairobi, Kenya

13 <sup>7</sup> Department of Pediatrics, Kiambu County Referral Hospital, Kiambu, Kenya

14 <sup>8</sup> World Alliance for Lung and Intensive Care Medicine in Uganda, Kampala, Uganda

15 <sup>9</sup> Department of Electrical and Computer Engineering, University of British Columbia, Vancouver, British  
16 Columbia, Canada

17 <sup>10</sup> Department of Pediatrics, University of British Columbia, Vancouver, British Columbia, Canada

18 Corresponding author

19 Email: [Cherri.Zhang@bcchr.ca](mailto:Cherri.Zhang@bcchr.ca)

## 20 **Abstract**

21 Age is an important risk factor among critically ill children with neonates being the most vulnerable.  
22 Clinical prediction models need to account for age differences and must be externally validated and  
23 updated, if necessary, to enhance reliability, reproducibility, and generalizability. We externally  
24 validated the Smart Triage model using a combined prospective baseline cohort from three hospitals in  
25 Uganda and two in Kenya using admission, mortality, and readmission. We evaluated model  
26 discrimination using area under the receiver-operator curve (AUROC) and visualized calibration plots. In  
27 addition, we performed subsetting analysis based on age groups (< 30 days, ≤ 2 months, ≤ 6 months,  
28 and < 5 years). We revised the model for neonates (< 1 month) by re-estimating the intercept and  
29 coefficients and selected new thresholds to maximize sensitivity and specificity. 11595 participants  
30 under the age of five (under-5) were included in the analysis. The proportion with an outcome ranged  
31 from 8.9% in all children under-5 (including neonates) to 26% in the neonatal subset alone. The model  
32 achieved good discrimination for children under-5 with AUROC of 0.81 (95% CI: 0.79-0.82) but poor  
33 discrimination for neonates with AUROC of 0.62 (95% CI: 0.55-0.70). Sensitivity at the low-risk  
34 thresholds (CI) were 0.85 (0.83-0.87) and 0.68 (0.58-0.76) for children under-5 and neonates,  
35 respectively. Specificity at the high-risk thresholds were 0.93 (0.93-0.94) and 0.96 (0.94-0.98) for  
36 children under-5 and neonates, respectively. After model revision for neonates, we achieved an AUROC  
37 of 0.83 (0.79-0.87) with 13% and 41% as the low- and high-risk thresholds, respectively. The Smart  
38 Triage model showed good discrimination for children under-5. However, a revised model is  
39 recommended for neonates due to their uniqueness in disease susceptibility, host response, and  
40 underlying physiological reserve. External validation of the neonatal model and additional external  
41 validation of the under-5 model in different contexts is required.

## 42 **Author summary**

43 Clinical prediction model has become evermore popular in various medical fields as it can improve  
44 clinical decision-making by providing personalized risk estimate for patients. It is a statistical technique  
45 that incorporates patient-specific factors to personalize treatment and optimize health resources  
46 allocation. Clinical prediction models need to be validated in a different setting and population, and  
47 updated accordingly to ensure accuracy and relevance in clinical settings. We aim to evaluate one such  
48 model currently being implemented at the outpatient pediatric department at multiple hospitals in  
49 Uganda and Kenya. This model has been incorporated into a digital platform that is used to quickly  
50 identify critically ill children at triage. After validating the model against different age groups, we found  
51 the current model is not well suited for neonates and thus attempted to update the model. Our study  
52 provides new insight into clinical variables that impact neonatal outcome and we hope to improve  
53 neonatal morality for low-resource settings.

## 54 **Introduction**

55 Significant progress has been made to decrease overall under the age of five (under-5) child  
56 mortality since the 1990s, though is due to improved outcomes among the non-neonatal population (1).  
57 Low- and middle-income countries (LMICs), particularly in Sub-Saharan Africa and South Asia continue to  
58 contribute disproportionately to childhood deaths globally (1). Amongst the five million children under-5  
59 that died in 2020, 2.4 million were neonates with infectious diseases such as diarrhea, lower respiratory  
60 tract infections, meningitis, and malaria being major contributors (2). Sepsis is a dysfunctional  
61 inflammatory pathway leading to infection, death, and co-morbidities account for the majority of  
62 emergency and acute care visits in LMICs (3).

63 Effective triage facilitates early identification of critically ill children in and can improve outcomes  
64 through case prioritization, as most in-hospital deaths in resource-poor settings occur within 24 hours of  
65 admission (4, 5). The Emergency Triage Assessment and Treatment (ETAT) guidelines have been

66 developed by the World Health Organization (WHO) for the assessment, triage, and initial management  
67 of acutely ill children in resource-poor facilities (6). The complexity of ETAT requires clinical knowledge,  
68 extensive memorization, and repetitive training, making its implementation a challenge in an  
69 environment where patient burden and new-staff turnover are high (7, 8, 9). An alternate solution is  
70 using electronic platforms with or without clinical prediction models which use data-driven algorithms  
71 to prioritize care (10, 11). One such example is the Smart Triage model, a 9-predictor pediatric triage  
72 model that can be embedded into a digital triage platform (12). Despite current progress, these models  
73 cannot be widely disseminated due to their lack of generalizability and external validation (13, 14, 15).

74 Prediction models are increasingly being used for individualized decision-making and to inform  
75 service delivery planning in health care (14). However, these models need to be externally validated  
76 before implementation in clinical settings (14, 16, 17). External validation can bridge the gap between  
77 the development and implementation of prediction models to ensure the model's reproducibility and  
78 generalizability (14). Whether a model should be re-derived or updated during external validation  
79 depends on its performance in the validation cohort, the availability of research resources, and the  
80 characteristics of participants in which the model will be applied (15). By keeping the same predictors,  
81 updating a model can maintain predictive performance without losing prior information captured in the  
82 original model (16). Thus, there is a clear need to optimize existing prediction models for new settings  
83 (15).

84 Geographical validation and subsetting of data are two ways to evaluate prediction models. This  
85 study conducted geographical validation of the Smart Triage model by combining data from three  
86 hospital sites in Uganda and two sites in Kenya. Subsetting the data measures model accuracy to ensure  
87 the model is applicable to different subgroups in a dataset as certain subgroup(s) can lead to skewed or  
88 inaccurate predictions. As age is an important factor in risk prediction, we aim to remove older age  
89 groups from the data to measure model accuracy. The neonatal period is recognized as the period

90 associated with the highest clinical risk (18), likely due to differences in inciting infections, disease  
91 susceptibility, host response, and underlying physiological reserve (19). To optimize the performance of  
92 the risk prediction across ages we hypothesize that patients under one month of age (neonates) have  
93 different risks and physiology and therefore require a different model. We update the model for this age  
94 group through a sequence of model-updating procedures (20).

## 95 **Method**

96 Model external validation and updating followed to Transparent Reporting of a multivariable  
97 prediction model for Individual Prognosis or Diagnosis (TRIPOD) guidelines on developing, validating, or  
98 updating a multivariable clinical prediction model (21).

### 99 **Study population and design**

100 The Smart Triage model was developed based on a prospective baseline cohort study conducted  
101 between April 2020 – March 2021 at the outpatient pediatric departments (OPD) of Jinja Regional  
102 Referral Hospital (Jinja), a public hospital funded by the Uganda Ministry of Health. It is the largest  
103 referral hospital in Eastern Uganda and serves patients residing in Jinja and eight surrounding districts.  
104 Its OPD, which functions similarly to an emergency department in high-income countries, evaluates  
105 between 20 and 100 patients per day and has an admission rate of approximately 20%.

106 The model was externally validated by combining baseline datasets from three additional sites in  
107 Uganda: Gulu Regional Referral Hospital (Gulu), Uganda Martyrs' Ibanda Hospital (Ibanda), and St.  
108 Joseph's Kitovu Hospital (Kitovu), and two sites in Kenya: Mbagathi County Hospital (Mbagathi) and  
109 Kiambu County Referral Hospital (Kiambu), separately for different age groups (< 30 days, ≤ 2 months, ≤  
110 6 months, and < 5 years). Ethics approval was obtained from the institutional review boards at the  
111 University of British Columbia in Canada (ID: H19-02398; H20-00484), Kenya Medical Research Institute

112 (ID: KEMRI/SERU/CGMR-C/183/3958), the Makerere University School of Public Health in Uganda (ID:  
113 SPH-2021-41), and the Uganda National Council for Science and Technology (ID: HS1745ES).

114 Data used for validation were prospective baseline cohort studies conducted from March 2021 –  
115 April 2022 at Gulu, December 2021 – May 2022 at Ibanda, December 2021 – June 2022 at Kitovu,  
116 February – December 2021 at Mbagathi, and March 2021 – December 2022 at Kiambu. Study nurses  
117 were recruited and trained to conduct study-specific procedures. They recruited and consented  
118 participants in the triage waiting area using a quasi-random sampling method based on time cut-offs,  
119 and collected health data. The OPD at Gulu, Ibanda, and Kitovu see approximately 150,000, 19,000, and  
120 19,000 patients annually with an admission rate of 18%, 33%, and 28%, respectively. The two hospitals  
121 in Kenya receive approximately 20,000 patients per year with an admission rate of 7% to 10%.

## 122 **Sampling and Eligibility**

123 The full details of study procedures are presented in previous publications (10, 12). Briefly, children  
124 under 12, 15, or 19 years of age seeking assessment for an acute illness at the pediatric emergency  
125 department of all hospital sites between 8:00 am and 5:00 pm were enrolled using time cut off sampling  
126 procedures. In addition to parental/caregiver consent, assent was obtained for children above eight  
127 years of age at Jinja and Gulu and 13 years of age in Kenya; although this study only uses under-5 data.  
128 Children at Ibanda and Kitovu were not individually consented as the program was implemented as a  
129 quality improvement program with a waiver of individual consent. Children presenting for elective  
130 procedures, scheduled appointments, or treatment of chronic illnesses were not eligible for enrollment.

## 131 **Data collection and management**

132 Data collection at all sites followed the same procedure that were used to develop the initial model  
133 at Jinja (12). Data were collected using password-secured Android tablets and a custom-built mobile  
134 application with an encrypted database. The Masimo iSpO2® Pulse Oximeter (City, Country) with micro

135 USB connector was connected directly to the tablet to collect pulse oximetry and heart rate, and the  
136 Welch Allen SureTemp 692 (City, Country) thermometer was used to measure core temperature. Data  
137 was uploaded directly from the Android tablets to REDCap (Research Electronic Data Capture) (23) and  
138 sent to the central study server at the BC Children’s Hospital Research Institute and KEMRI Wellcome  
139 Trust Research Programme office for Uganda and Kenya, respectively. After each upload, data on the  
140 tablets was automatically deleted. Standard operating protocols for data collection and management  
141 are available on the Pediatric Sepsis CoLab Dataverse (24).

## 142 **Primary Outcome**

143 The composite endpoint composed of one or more of the following: hospital admission of 24 hours  
144 or more determined from hospital records, readmission within 48 hours of enrollment, and mortality  
145 including in-hospital or post-discharge. Admission, readmission, and in-hospital or post-discharge  
146 mortality status were confirmed by follow-up phone calls to the caregivers 7 days post-study enrollment  
147 (for non-admitted patients) or post-discharge. As a secondary analysis, the proportion of children with a  
148 composite endpoint was compared using Fisher’s exact test between those over six months of age to  
149 under-5 and those six months and under.

## 150 **Smart Triage Model**

151 The multiple logistic model was derived using bootstrap stepwise regression method and based on  
152 clinical validity with nine predictor variables included in the final equation. The model was integrated  
153 into a mobile application with a built-in pulse oximetry application that can be connected to a sensor,  
154 providing a smart algorithm that detects disease severity or level of risk in a child presenting to the  
155 hospital. The mobile application sends data to an interactive dashboard that provides clinical  
156 measurements and triage data to physicians in real-time allowing for rapid identification and  
157 assessment of critically ill children (12, 22).

158 The nine predictors included in the model were the square root of age, to attempt to linearize the  
159 nonlinear relationship between age and risk, heart rate, temperature, mid-upper arm circumference  
160 (MUAC), transformed oxygen saturation (using the concept of virtual shunt (25)), parental concern,  
161 difficulty breathing, oedema, and pallor (S1 Appendix).

## 162 **Statistical analysis**

### 163 **Sample Size**

164 Sample size was pre-determined at each site prior to enrollment. In Uganda, it was computed based  
165 on the formula  $N = (nx10)/I$  where N is the sample size, n is the number of candidate predictor variables,  
166 and I is the estimated event rate in the population. The Smart Triage model developed at Jinja has nine  
167 predictors and an admission rate of 20%; thus, requiring a minimum sample of 450 participants. In other  
168 Ugandan sites, admission rate was used to calculate approximate sample size needed since predictors  
169 were already determined. In Kenya, a four-step procedure was implemented in the pmsampsize R  
170 package (26) to determine the minimum required sample to perform model validation. An input C-  
171 statistic of 0.8, an admission rate of 0.05, a Cox-Snell R-sq of 0.0697 based on 0.05 acceptable difference  
172 in apparent and adjusted R-squared, 0.05 margin of error in estimation of intercept, and an event per  
173 predictor parameter of 7 were assumed.

### 174 **Model Validation, calibration, and update**

175 The Smart Triage model equation was applied to a combined dataset comprising of five hospital  
176 sites, separated into four age groups: < 1 month, ≤ 2 months, ≤ 6 months, and < 5 years. These age  
177 groups were chosen based on the WHO's age classification for special statistics of infant mortality (26).  
178 The older age groups were subsequently removed from the data starting with > 6 months, then > 2  
179 months, followed by ≥ 1 month until only neonates remained to assess the model's performance in the  
180 younger population. We also performed validation using exclusive age groups: >6m to < 5y, >2m to 6m,  
181 and 1m-2m, and neonates only. The sample size for each age category was still sufficient following the N



182 = (nx10)/1 rule. The model was assessed for its overall performance, discrimination, and calibration (14,  
183 28, 29). The overall performance of the model was assessed using Brier Score, ranging from 0 to 1, with  
184 smaller values indicating a better model. Discrimination was assessed using area under the receiver  
185 operating curve (AUROC) and visualized with receiver operating characteristic (ROC) curves. AUROC  
186 close to 1 indicates good discrimination, while AUROC close to 0.5 indicates an inability to discriminate  
187 (28). Calibration was evaluated via calibration plots of predicted versus observed outcome rates with a  
188 45-degree line representing perfect calibration (29). A calibration intercept of 0 and a slope of 1 is  
189 considered ideal. The model was updated for neonates only through a series of steps from recalibration  
190 to model revision, including the original Jinja cohort. The first step was recalibration-in-the-large to  
191 address the difference in baseline risks by re-estimating the model intercept. The next step was logistic  
192 recalibration to re-estimate the intercept and slope. Finally, a model revision was performed by re-  
193 estimating all regression coefficients using the same set of predictors. Age was not square rooted due to  
194 narrower range. Each step was visually examined with a calibration plot along with AUROC,  
195 Observed/Expected ratio, and calibration intercept and slope. An internal validation was performed  
196 using a 10-fold cross-validation procedure applied to the entire dataset due to the smaller sample size of  
197 neonates. A pooled estimate of AUROC, sensitivity, specificity, and predictive values was computed to  
198 quantify predictive accuracy.

### 199 **Risk stratification**

200 Following our previously reported model development process (12), two new risk thresholds were  
201 selected for the new models to divide participants into three triage categories (emergency, priority, and  
202 non-urgent). The low-risk threshold was selected at 90% sensitivity to limit misclassification of  
203 emergency and priority cases as non-urgent (avoiding false negatives), while the high-risk threshold was  
204 selected at 90% specificity to limit misclassification of non-urgent or priority cases as emergency cases

205 (avoiding false positives). A risk classification table was used to examine the accuracy of the updated  
206 model in classifying patients.

207 Missing values were very few and were imputed using median and mode for continuous and  
208 categorical variables, respectively. Analyses were conducted in Stata version 15.0/MP (StataCorp,  
209 College Station, TX), R version 4.1.3 (R Foundation for Statistical Computing, Vienna, Austria), and  
210 RStudio version 2022.2.3 (RStudio, Boston, MA).

## 211 Results

### 212 Participants

213 A total of 13285 participants were enrolled in the study with 11595 (87%) under-5 included in the  
214 analysis and neonates accounted for 404 (3.5%) of the under-5. There was a higher prevalence of  
215 males in all the age groups, with a ratio of roughly 53% vs 46% (Table 1). Approximately 9% of the  
216 participants under-five were admitted to the hospital and that proportion increased as younger age  
217 groups were considered as the denominator, reaching 26% in neonates. There was a statistically  
218 significant difference (p-value < 0.0001) in the proportion of participants with a positive outcome  
219 between those over six months of age and those six months and under. For all age groups, more than  
220 90% of those admitted had a minimum length of stay of 24 hours and less than 1% were sent home and  
221 readmitted within 48 hours. Pneumonia and neonatal sepsis were the most common reasons for  
222 admission in participants under-5. Malaria was more common in older children 140 (13.9%) and no  
223 neonates were admitted with a malaria diagnosis.

224 **Table 1. Participant characteristics**

|                                      | < 5 years, n (%) | ≤ 6 months, n (%) | ≤ 2 months, n (%) | < 1 month, n (%) |
|--------------------------------------|------------------|-------------------|-------------------|------------------|
| <b>Total participant<sup>1</sup></b> | 11595            | 2421 (20.9)       | 886 (7.6)         | 404 (3.5)        |
| <b>Sex</b>                           |                  |                   |                   |                  |
| Male                                 | 6161 (53.1)      | 1298 (53.6)       | 494 (55.8)        | 216 (53.5)       |
| Female                               | 5434 (46.9)      | 1123 (46.4)       | 392 (44.2)        | 188 (46.5)       |
| <b>Outcomes</b>                      |                  |                   |                   |                  |

|                                                                    |              |             |            |            |
|--------------------------------------------------------------------|--------------|-------------|------------|------------|
| Admitted <sup>2</sup>                                              | 1004 (8.7)   | 273 (11.3)  | 154 (17.4) | 105 (26.0) |
| Length of stay $\geq$ 24 h <sup>3</sup>                            | 979 (97.5)   | 260 (95.2)  | 144 (93.5) | 96 (91.4)  |
| Readmitted <sup>3</sup>                                            | 20 (2.0)     | 6 (2.2)     | 3 (1.9)    | 2 (1.9)    |
| Within 48 h <sup>3</sup>                                           | 3 (0.3)      | 2 (0.7)     | 1 (0.6)    | 1 (1.0)    |
| Mortality <sup>3</sup>                                             | 27 (2.7)     | 17 (6.2)    | 9 (3.5)    | 6 (5.7)    |
| Not admitted <sup>2</sup>                                          | 10591 (91.3) | 2148 (88.7) | 732 (82.6) | 299 (74.0) |
| Returned and readmitted <sup>3</sup>                               | 41 (0.4)     | 7 (0.3)     | 4 (0.5)    | 2 (0.7)    |
| Within 48 h <sup>3</sup>                                           | 28 (0.3)     | 1 (0.05)    | 4 (0.5)    | 2 (0.7)    |
| Mortality <sup>3</sup>                                             | 23 (0.2)     | 7 (0.3)     | 5 (0.7)    | 4 (1.3)    |
| Composite endpoint <sup>2</sup>                                    | 1037 (8.9)   | 278 (11.5)  | 156 (17.6) | 105 (26.0) |
| <b>Admission diagnosis profile<sup>4</sup></b>                     |              |             |            |            |
| Malaria                                                            | 140 (13.9)   | 6 (2.2)     | 2 (1.4)    | 0          |
| Pneumonia                                                          | 425 (42.3)   | 119 (43.6)  | 39 (27.1)  | 13 (12.4)  |
| Bronchiolitis                                                      | 12 (1.2)     | 7 (2.6)     | 4 (2.8)    | 1 (1.0)    |
| URTI (cold, flu, etc)                                              | 22 (2.2)     | 1 (0.4)     | 0          | 0          |
| Reactive Airway disease/asthma                                     | 1 (0.1)      | 0           | 0          | 0          |
| Gastroenteritis/diarrhea                                           | 67 (6.7)     | 4 (1.5)     | 2 (1.4)    | 0          |
| Meningitis/encephalitis or other CNS infection                     | 16 (1.6)     | 2 (0.7)     | 1 (0.7)    | 1 (1.0)    |
| Skin/soft tissue infection                                         | 5 (0.5)      | 2 (0.7)     | 0          | 0          |
| Measles                                                            | 1 (0.1)      | 0           | 0          | 0          |
| Sepsis                                                             | 67 (6.7)     | 13 (4.8)    | 9 (6.3)    | 5 (4.8)    |
| Neonatal sepsis                                                    | 42 (4.2)     | 41 (15.0)   | 38 (26.4)  | 35 (33.3)  |
| Anemia                                                             | 57 (5.7)     | 12 (4.4)    | 6 (4.2)    | 1 (1.0)    |
| Malnutrition                                                       | 22 (2.2)     | 3 (1.1)     | 2 (1.4)    | 0          |
| Other (e.g., fever, convulsions, Jaundice, Neonatal Jaundice etc.) | 107 (10.7)   | 63 (23.1)   | 41 (28.5)  | 49 (46.7)  |

225 Note: age groups are inclusive, i.e. < 5 years includes the younger age groups. <sup>1</sup> percentage is based on  
226 total number included in the study, <sup>2</sup> percentage based on total number in the age group. <sup>3</sup> percentage  
227 based on the total number in the outcome category per age group, i.e. admitted and not admitted. <sup>4</sup>  
228 percentage based on total number of admissions per age group.

## 229 **Model performance and risk stratification**

230 The overall performance of the Smart Triage model was best when all age groups were included  
231 with a Brier score of 0.08. As older age groups were removed, the Brier score increased to 0.18 in  
232 neonates. The model achieved good discrimination for all age groups, except neonates, with AUROC  
233 values ranging from 0.81 (95% CI: 0.79-0.82) for under-5 to 0.70 (95% CI: 0.65-0.76) for two months and  
234 under (Fig 1). The model achieved poor discrimination for neonates with an AUROC of 0.62 (95% CI:  
235 0.55-0.70). The calibration slope also decreased in younger age groups with a value of 0.78 for under-5

236 to 0.42 for neonates (Fig 2). The assessment of exclusive age groups (>6m to < 5y, >2m to 6m, and 1m-  
 237 2m) also resulted in good discrimination with AUROC of 0.82, 0.85, and 0.83, respectively, for all age  
 238 groups except neonates (S1 Figure). Calibration plots showed a similar phenomenon (S2 Figure). When  
 239 comparing model performance between inclusive and exclusive groups, the inclusion of younger  
 240 participants decreased the model performance.

241 **Fig 1. ROC curves by age groups**

242 **Fig 2. Calibration plots by age groups**

243 Table 2 shows the sensitivity and the specificity of the Smart Triage model by triage categories for  
 244 each age group. The model achieved 85% (95% CI: 83%-87%) sensitivity at the low-risk threshold (non-  
 245 urgent) and 93% (95% CI: 93%-94%) specificity at the high-risk threshold (emergency) for children under-  
 246 5. Sensitivity decreased as older cohorts were taken out, while specificity remained relatively  
 247 unchanged. For neonates, sensitivity was 68% (95% CI: 58%-76%) at the low-risk threshold, and  
 248 specificity was 96% (95% CI: 94%-98%) at the high-risk threshold. The model identified around 10% of  
 249 the participants as emergency. When examining mutually exclusive age groups, sensitivity remained  
 250 high, ranging from 86% to 90% at the low-risk threshold, and specificity ranged from 93% to 98% (S1  
 251 Table).

252 **Table 2. Summary of risk stratification into the three triage categories and model performance**

|                                            | <b>Non-urgent</b> | <b>Priority</b>        | <b>Emergency</b> |
|--------------------------------------------|-------------------|------------------------|------------------|
| <b>Risk threshold</b>                      | <b>≤ 0.08</b>     | <b>&gt;0.08 ≤ 0.40</b> | <b>&gt; 0.40</b> |
| <b>Under 5 years</b>                       |                   |                        |                  |
| Participant, n (%)                         | 6018 (51.9)       | 4384 (37.8)            | 1193 (10.3)      |
| Participant with composite endpoint, n (%) | 151 (2.5)         | 415 (9.5)              | 471 (39.5)       |
| Sensitivity                                | 0.85 (0.83-0.87)  | 0.73 (0.71-0.76)       | 0.45 (0.42-0.48) |
| Specificity                                | 0.56 (0.55-0.57)  | 0.75 (0.74-0.76)       | 0.93 (0.93-0.94) |
| NPV                                        | 0.97 (0.97-0.98)  | 0.97 (0.96-0.97)       | 0.95 (0.94-0.95) |
| PPV                                        | 0.16 (0.15-0.16)  | 0.22 (0.22-0.23)       | 0.39 (0.37-0.42) |
| <b>6 months and under</b>                  |                   |                        |                  |
| Participant, n (%)                         | 1339 (55.3)       | 887 (36.6)             | 195 (8.1)        |

|                                            |                  |                  |                  |
|--------------------------------------------|------------------|------------------|------------------|
| Participant with composite endpoint, n (%) | 53 (4.0)         | 123 (13.9)       | 102 (52.3)       |
| Sensitivity                                | 0.81 (0.76-0.86) | 0.67 (0.62-0.72) | 0.37 (0.31-0.42) |
| Specificity                                | 0.60 (0.58-0.62) | 0.79 (0.77-0.81) | 0.96 (0.95-0.97) |
| NPV                                        | 0.96 (0.95-0.97) | 0.95 (0.94-0.96) | 0.92 (0.91-0.93) |
| PPV                                        | 0.21 (0.20-0.22) | 0.29 (0.27-0.32) | 0.52 (0.46-0.59) |
| 2 months and under                         |                  |                  |                  |
| Participant, n (%)                         | 461 (52.0)       | 361 (40.7)       | 64 (7.2)         |
| Participant with composite endpoint, n (%) | 41 (8.9)         | 73 (20.2)        | 42 (65.6)        |
| Sensitivity                                | 0.74 (0.67-0.81) | 0.58 (0.49-0.65) | 0.27 (0.20-0.34) |
| Specificity                                | 0.58 (0.54-0.62) | 0.77 (0.74-0.80) | 0.97 (0.96-0.98) |
| NPV                                        | 0.91 (0.89-0.93) | 0.90 (0.88-0.91) | 0.86 (0.85-0.87) |
| PPV                                        | 0.27 (0.25-0.30) | 0.35 (0.31-0.39) | 0.66 (0.55-0.77) |
| Under 1 month                              |                  |                  |                  |
| Participant, n (%)                         | 182 (45.0)       | 184 (45.5)       | 38 (9.4)         |
| Participant with composite endpoint, n (%) | 34 (18.7)        | 45 (24.5)        | 26 (68.4)        |
| Sensitivity                                | 0.68 (0.58-0.76) | 0.51 (0.42-0.61) | 0.25 (0.16-0.33) |
| Specificity                                | 0.50 (0.44-0.55) | 0.73 (0.68-0.78) | 0.96 (0.94-0.98) |
| NPV                                        | 0.81 (0.77-0.86) | 0.81 (0.78-0.84) | 0.78 (0.77-0.81) |
| PPV                                        | 0.32 (0.28-0.36) | 0.40 (0.33-0.46) | 0.68 (0.54-0.82) |

### 253 Model update for neonates

254 As discrimination, calibration, and sensitivity dropped by 0.19, 0.36, and 17%, respectively, an  
 255 updated model was developed for neonates. Fig 3 shows the sequence of the model update process.  
 256 Each step resulted in an improvement in calibration (reaching the ideal value of 1 at step two) but  
 257 limited improvement in discrimination until the final stage of model revision. The final model resulted in  
 258 an AUROC of 0.83 (95% CI: 0.79-0.87) and calibration intercept and slope of 0 and 1, respectively (Fig 4).  
 259 New intercept and coefficients for the predictor variables were derived. The equation from the updated  
 260 model is:

$$\begin{aligned}
 \text{logit}(p) = & -21.847 + (-3.415 \times \text{age}) + (-0.013 \times \text{heart rate}) + (0.674 \times \text{temperature}) \\
 & + (-0.011 \times \text{mid - upper arm circumference}) \\
 & + (0.048 \times \text{transformed oxygen saturation}) + (3.135 \times \text{parent concern}) \\
 & + (0.216 \times \text{difficulty breathing}) + (-3.332 \times \text{oedema}) + (1.588 \times \text{pallor})
 \end{aligned}$$

262 **Fig 3. Model update for neonates only**

263 **Fig 4. ROC curve and calibration plot of updated model for neonates**

264 Two new thresholds were chosen at 0.13 and 0.41 for the low and high risk, respectively, based on  
 265 the desired sensitivity and specificity. Sensitivity at the low-risk threshold was 91% (95% CI: 86%-95%),  
 266 and specificity at the high-risk threshold was 90% (95% CI: 87%-93%). The new model placed 23% of  
 267 neonates into the emergency category, and 68% of those had an outcome.

268 **Table 4. Summary of risk stratification in neonates by the updated model**

|                                               | <b>Non-urgent</b> | <b>Priority</b>        | <b>Emergency</b> |
|-----------------------------------------------|-------------------|------------------------|------------------|
| <b>Risk threshold</b>                         | <b>≤ 0.13</b>     | <b>&gt;0.13 ≤ 0.41</b> | <b>&gt; 0.41</b> |
| <b>Participant and Outcome Stratification</b> |                   |                        |                  |
| Participant, n (%)                            | 178 (36.9)        | 192 (39.8)             | 113 (23.4)       |
| Participant with composite endpoint, n (%)    | 12 (6.7)          | 43 (22.4)              | 77 (68.1)        |
| <b>Admission status</b>                       |                   |                        |                  |
| Admitted, n (%)                               | 10 (5.6)          | 46 (24.0)              | 79 (69.9)        |
| Not admitted, n (%)                           | 168 (94.4)        | 146 (76.0)             | 34 (30.1)        |
| <b>Length of stay</b>                         |                   |                        |                  |
| < 24h, n (%)                                  | 0                 | 5 (2.6)                | 5 (4.4)          |
| ≥ 24h, n (%)                                  | 10 (5.6)          | 39 (20.3)              | 74 (65.5)        |
| <b>Readmitted</b>                             |                   |                        |                  |
| Within 48 h, n (%)                            | 1 (0.6)           | 1 (0.5)                | 1 (0.9)          |
| Beyond 48 h, n (%)                            | 1 (0.6)           | 1 (0.5)                | 1 (0.9)          |
| Mortality, n (%)                              | 1 (0.6)           | 6 (3.1)                | 5 (4.4)          |
| <b>Performance Assessment</b>                 |                   |                        |                  |
| True positive to false positive ration        | 120:185           | 106:98                 | 78:35            |
| Sensitivity (95% CI)                          | 0.91 (0.86-0.95)  | 0.80 (0.73-0.87)       | 0.58 (0.49-0.66) |
| Specificity (95% CI)                          | 0.47 (0.42-0.52)  | 0.72 (0.67-0.76)       | 0.90 (0.87-0.93) |
| Negative predictive value (95% CI)            | 0.93 (0.90-0.97)  | 0.91 (0.88-0.94)       | 0.85 (0.82-0.88) |
| Positive predictive value (95% CI)            | 0.39 (0.37-0.42)  | 0.52 (0.48-0.57)       | 0.68 (0.61-0.76) |
| Negative likelihood ratio (95% CI)            | 0.19 (0.10-0.33)  | 0.28 (0.17-0.40)       | 0.47 (0.37-0.59) |
| Positive likelihood ratio (95% CI)            | 1.72 (1.48-1.98)  | 2.86 (2.21-3.63)       | 5.80 (3.77-9.43) |

269 **Discussion**

270 This study externally validated the Smart Triage model in all children under five years of age using  
 271 combined datasets from five hospital sites in Uganda and Kenya and evaluated performance across  
 272 different age groups. Neonates had a higher proportion of composite endpoint at 26% compared to

273 8.9% in those under-5. The model achieved good discrimination with an AUROC of 0.81 in all children  
274 under-5. However, its discrimination decreased each time when older age cohorts were excluded, down  
275 to an AUROC of 0.62 for neonates. Calibration also deteriorated for those two months and under.  
276 Similarly, when comparing model performance using data that included neonates to data that did not,  
277 performance was better in the dataset that excluded neonates; therefore, the original Smart Triage  
278 model is not suitable for neonates. The model was updated for this age group by re-estimating the  
279 intercept and the coefficients of the selected predictors. Discrimination and calibration improved upon  
280 model revision with an AUROC of 0.83.

### 281 **External validation**

282 External validation showed that the model maintained good discrimination in the new cohort at all  
283 sites. However, the model overpredicted the probability of having a composite endpoint due to a lower  
284 admission rate among the new cohorts at Gulu and the two sites in Kenya. Differences in the outcome  
285 incidence is the most likely cause of the miscalibration. When an algorithm is developed in a setting with  
286 high disease prevalence, it may systematically overestimate risk when used in settings with lower  
287 disease incidence (30). The difference in performance is due to the strength of the association between  
288 some predictors and the outcome being substantially different in the new population (31). This was  
289 evident when refitting the logistic regression in the new combined under-5 cohort (S2 Table). Heart rate  
290 and oedema were no longer statistically significant predictors because there were fewer percentage of  
291 children with oedema in the validation set despite the sample size being ten times larger than the  
292 derivation set (S3 Table). Additionally, the coefficient for square root of age changed from positive to  
293 negative in this refitting (S2 Table). The proportion of outcomes per categorical predictor were less in  
294 the external validation data set (S2 Table). Heterogeneity in predictor effects across the range of values  
295 of predictors can degrade overall performance. The discrimination and calibration decreased as older  
296 participants were excluded as would be clinically anticipated due to the differences in physiology and

297 pathology in the younger age group. Another reason for the decrease in discriminative performance is  
298 that the range of age is smaller in neonates, and age is a predictor in our model that affects model  
299 performance (14, 32). Calibration in lower age groups is more heterogeneous (Fig 2), which may be  
300 magnified by smaller sample sizes, differences in case mix between the development and validation  
301 cohorts, and participants being clinically heterogeneous amongst each other.

### 302 **Model update for neonates**

303 We updated the model for neonates as they differ in disease susceptibility, host response, and  
304 underlying physiological reserve. The first 28 days of life is the most vulnerable period and neonates are  
305 more likely to be admitted to hospital (18). Low birth weight, congenital malformations, unique  
306 infections, and gestational age are factors related to a worse outcome that may not significantly impact  
307 older children (33). Factors impacting neonatal outcomes may be different from those one month and  
308 older. This was evident in our data which indicated half of the predictors used in the original model to  
309 predict admission and mortality among children under-5 were no longer statistically significant in the  
310 updated model among neonates (S4 Table). Nonetheless, transformed oxygen saturation (OR 1.05,  
311 95%CI 1.02-1.08) and temperature (OR 1.96, 95%CI 1.45-2.69) are still significant risk factors for a  
312 composite endpoint (S4 Table). The reduced performance of the model for neonates was anticipated.  
313 We followed a sequence of three updating methods that differed in extensiveness. Recalibration-in-the-  
314 large, adjusting the intercept (baseline risk), showed a modest improvement in calibration. Re-  
315 estimation of the intercept and slope continued to improve calibration; however, re-estimating all  
316 coefficients of the included predictors was necessary to improve discrimination as it is evident in the  
317 improvement of AUROC from 0.66 to 0.83. Previous studies have shown that when the model's  
318 discrimination needs to be improved, revision methods are necessary (16, 32). Model updating with a  
319 new set of predictors may be the optimal approach; however, a trade-off between research resources  
320 and model improvement needs to be considered. Revision methods with small adjustments for



321 predictors are preferred when a particular predictor in the original model has a different effect in the  
322 updating set (16). In our study, we opted to keep the original predictors and update the coefficients. A  
323 previous study has demonstrated that retaining the original selected variables where all coefficients are  
324 re-estimated using a large dataset improves both discrimination and calibration of the model (34).

### 325 **Clinical implication**

326 External validation of clinical prediction models is critically important before implementation  
327 because models generally perform poorer during this external validation (14). It is imperative that  
328 prediction models are accurate in order to deliver precise case prioritization and appropriate  
329 individualized care recommendations based on illness severity to optimize patient outcomes. Thus far, a  
330 review that examined 84032 studies on prediction models concluded that only 5% had been externally  
331 validated (14). Furthermore, current neonatal predictive models used in low resources settings are  
332 developed mainly for estimating in-hospital mortality or limited to predefined populations such as  
333 infants born to mothers with severe preeclampsia or premature/low birth weight infants. We have  
334 demonstrated that the Smart Triage model, a parsimonious triage model, performs well during external  
335 validation in a different but related geographical context, making it reproducible. It is currently  
336 implemented at several sites in Uganda and Kenya (under review). We have also demonstrated that  
337 significantly improved performance can be achieved in a data subset by updating a model based on the  
338 same parsimonious variables. The high negative predictive performance of the model at the low-risk  
339 threshold demonstrates its ability to exclude low-risk patients. A positive predictive value of 68% (95% CI  
340 61%-76%) was achieved at the high-risk threshold which, given the relatively low prevalence of  
341 composite endpoint, demonstrates the capability of the model to correctly classify emergency patients.  
342 The positive likelihood ratio indicates a 5.8-fold increase in the odds of needing hospital admission for a  
343 patient classified as emergency (Table 3). Furthermore, 91% of participants admitted for at least 24 h,  
344 and 92% of deaths were contained in either the priority or emergency category (Table 3). The parsimony

345 of the Smart Triage model is easy to interpret and understand. This interpretability is particularly  
346 important where the results of a model may be used to make life-changing decisions. It requires less  
347 computation power and time to train, evaluate, and deploy compared to ETAT, making it practical for  
348 real-time applications where data may be limited and speed and efficiency are important.

### 349 **Strengths and Limitations**

350 The key limitation of this study is that the validation sites were in adjacent geographical regions. The  
351 sites were similar in types of health facilities, but there were differences in disease prevalence and  
352 socioeconomic status between facilities that added to the heterogeneity of the cohorts. The optimal  
353 resemblance between the original and validation cohorts is a trade-off between reproducibility and  
354 generalizability. The next steps would be external validation on a different continent or in an urban  
355 tertiary care facility. Subsetting our data was a further limitation as subgroups in a dataset are  
356 underrepresented, leading to skewed or inaccurate predictions introducing a potential data bias.  
357 However, we used our clinical knowledge of age-specific disease processes to stratify our cohort into  
358 specific age categories, and with additional cohorts, we were able to stratify subsets by age and improve  
359 the model performance with model adjustment in the neonatal age group. A key strength of this study is  
360 the use of a large dataset from multiple sites for external validation to offer good statistical power. The  
361 use of routinely available clinical data resulted in low rates of missing data. The updated model was  
362 internally validated using the bootstrapping technique, which is the most widely recommended  
363 technique for internal validation as it allows derivation of the final model from the full derivation sample  
364 and does not waste precious information (35). In addition, the revised model used a portion of the  
365 original data, preventing overfitting (35).

### 366 **Conclusion**

367 The Smart Triage model has been externally validated for similar clinical contexts in East Africa. An  
368 updated model for neonates is proposed, but will require additional external validation. The model is

369 currently implemented in Uganda and Kenya to rapidly identify critically ill children at the first point of  
370 contact using routine clinical data and readily available vital signs. There is demonstrated evidence of  
371 improvement in the quality of care and patient outcomes as well as cost-effectiveness (36, 37). We  
372 believe the model is well adapted to use in resource-poor settings; however, further research is needed  
373 to continue to refine the model to increase its reproducibility and generalizability.

## 374 **Acknowledgement**

375 We would like to thank the administration and staff of the Jinja Regional Referral Hospital, Gulu  
376 Regional Referral Hospital, Uganda Martyrs' Ibanda Hospital, and St. Joseph's Kitovu Hospital, Mbagathi  
377 County Hospital and Kiambu County Referral Hospital, and participants and caregiver for their time and  
378 dedication to Smart Triage. We would also like to thank Walimu and the Pediatric Sepsis CoLab.

## References

1. UNICEF. Under-five mortality 2023 [Available from: <https://data.unicef.org/topic/child-survival/under-five-mortality/>].
2. Organization WH. Child mortality (under 5 years) 2022 [Available from: <https://www.who.int/news-room/fact-sheets/detail/levels-and-trends-in-child-under-5-mortality-in-2020>].
3. Kwizera A, Kissoon N, Musa N, Urayeneza O, Mujyarugamba P, Patterson AJ, et al. A Machine Learning-Based Triage Tool for Children With Acute Infection in a Low Resource Setting. *Pediatr Crit Care Med*. 2019;20(12):e524-e30.
4. Kapoor R, Sandoval MA, Avendano L, Cruz AT, Soto MA, Camp EA, et al. Regional scale-up of an Emergency Triage Assessment and Treatment (ETAT) training programme from a referral hospital to primary care health centres in Guatemala. *Emerg Med J*. 2016;33(9):611-7.
5. Dekker-Boersema J, Hector J, Jefferys LF, Binamo C, Camilo D, Muganga G, et al. Triage conducted by lay-staff and emergency training reduces paediatric mortality in the emergency department of a rural hospital in Northern Mozambique. *Afr J Emerg Med*. 2019;9(4):172-6.
6. UPDATED GUIDELINE: Paediatric emergency triage, assessment and treatment care of critically ill children [press release]. 2016.
7. Molyneux E, Ahmad S, Robertson A. Improved triage and emergency care for children reduces inpatient mortality in a resource-constrained setting. *Bull World Health Organ*. 2006;84(4):314-9.
8. Hategeka C, Mwai L, Tuyisenge L. Implementing the Emergency Triage, Assessment and Treatment plus admission care (ETAT+) clinical practice guidelines to improve quality of hospital care in Rwandan district hospitals: healthcare workers' perspectives on relevance and challenges. *BMC Health Serv Res*. 2017;17(1):256.

9. Mupara LU, Lubbe JC. Implementation of the Integrated Management of Childhood Illnesses strategy: challenges and recommendations in Botswana. *Glob Health Action*. 2016;9:29417.
10. Mpimbaza A, Sears D, Sserwanga A, Kigozi R, Rubahika D, Nadler A, et al. Admission Risk Score to Predict Inpatient Pediatric Mortality at Four Public Hospitals in Uganda. *PLoS One*. 2015;10(7):e0133950.
11. Mawji A, Akech S, Mwaniki P, Dunsmuir D, Bone J, Wiens MO, et al. Derivation and internal validation of a data-driven prediction model to guide frontline health workers in triaging children under-five in Nairobi, Kenya. *Wellcome Open Res*. 2019;4:121.
12. Mawji A, Li E, Dunsmuir D, Komugisha C, Novakowski SK, Wiens MO, et al. Smart triage: Development of a rapid pediatric triage algorithm for use in low-and-middle income countries. *Front Pediatr*. 2022;10:976870.
13. George EC, Walker AS, Kiguli S, Olupot-Olupot P, Opoka RO, Engoru C, et al. Predicting mortality in sick African children: the FEAST Paediatric Emergency Triage (PET) Score. *BMC Med*. 2015;13:174.
14. Ramspek CL, Jager KJ, Dekker FW, Zoccali C, van Diepen M. External validation of prognostic models: what, why, how, when and where? *Clin Kidney J*. 2021;14(1):49-58.
15. Binuya MAE, Engelhardt EG, Schats W, Schmidt MK, Steyerberg EW. Methodological guidance for the evaluation and updating of clinical prediction models: a systematic review. *BMC Med Res Methodol*. 2022;22(1):316.
16. Janssen KJ, Moons KG, Kalkman CJ, Grobbee DE, Vergouwe Y. Updating methods improved the performance of a clinical prediction model in new patients. *J Clin Epidemiol*. 2008;61(1):76-86.
17. Ewout W S. *Clinical Prediction Models: A Practical Approach to Development, Validation, and Updating*. Second ed. Gail M, editor. Switzerland: Springer; 2019.
18. UNICEF. *Levels and Trends in Child Mortality*. 2023.

19. Nemetchek BR, Liang LD, Kissoon N, Ansermino JM, Kabakyenga J, Lavoie PM, et al. Predictor variables for post-discharge mortality modelling in infants: a protocol development project. *Afr Health Sci*. 2018;18(4):1214-25.
20. Vergouwe Y, Nieboer D, Oostenbrink R, Debray TPA, Murray GD, Kattan MW, et al. A closed testing procedure to select an appropriate method for updating prediction models. *Stat Med*. 2017;36(28):4529-39.
21. Collins GS, Reitsma JB, Altman DG, Moons KG. Transparent reporting of a multivariable prediction model for individual prognosis or diagnosis (TRIPOD): the TRIPOD Statement. *BMC Med*. 2015;13:1.
22. Mawji A, Li E, Komugisha C, Akech S, Dunsmuir D, Wiens MO, et al. Smart triage: triage and management of sepsis in children using the point-of-care Pediatric Rapid Sepsis Trigger (PRST) tool. *BMC Health Serv Res*. 2020;20(1):493.
23. Harris PA, Taylor R, Thielke R, Payne J, Gonzalez N, Conde JG. Research electronic data capture (REDCap)--a metadata-driven methodology and workflow process for providing translational research informatics support. *J Biomed Inform*. 2009;42(2):377-81.
24. Mawji A. Smart Triage Jinja Standard Operating Protocols, V1 [dataset] Scholars Portal Dataverse2021 [Available from: <https://borealisdata.ca/dataset.xhtml?persistentId=doi:%2010.5683/SP2/WLU0DJ>].
25. Tushaus L, Moreo M, Zhang J, Hartinger SM, Mausezahl D, Karlen W. Physiologically driven, altitude-adaptive model for the interpretation of pediatric oxygen saturation at altitudes above 2,000 m a.s.l. *J Appl Physiol (1985)*. 2019;127(3):847-57.
26. Ensor J, Martin EC, Riley RD. Package 'pmsampsize'. 2022.

27. Nations U. Provisional guidelines on standard international age classifications. New York: United Nations, Department of International Economic and Social Affairs, Statistical Office; 1982. Contract No.: M.
28. Steyerberg EW, Vickers AJ, Cook NR, Gerds T, Gonen M, Obuchowski N, et al. Assessing the performance of prediction models: a framework for traditional and novel measures. *Epidemiology*. 2010;21(1):128-38.
29. Alba AC, Agoritsas T, Walsh M, Hanna S, Iorio A, Devereaux PJ, et al. Discrimination and Calibration of Clinical Prediction Models: Users' Guides to the Medical Literature. *JAMA*. 2017;318(14):1377-84.
30. Steyerberg EW, Roobol MJ, Kattan MW, van der Kwast TH, de Koning HJ, Schroder FH. Prediction of indolent prostate cancer: validation and updating of a prognostic nomogram. *J Urol*. 2007;177(1):107-12; discussion 12.
31. Su TL, Jaki T, Hickey GL, Buchan I, Sperrin M. A review of statistical updating methods for clinical prediction models. *Stat Methods Med Res*. 2018;27(1):185-97.
32. Toll DB, Janssen KJ, Vergouwe Y, Moons KG. Validation, updating and impact of clinical prediction rules: a review. *J Clin Epidemiol*. 2008;61(11):1085-94.
33. Medvedev MM, Brotherton H, Gai A, Tann C, Gale C, Waiswa P, et al. Development and validation of a simplified score to predict neonatal mortality risk among neonates weighing 2000 g or less (NMR-2000): an analysis using data from the UK and The Gambia. *Lancet Child Adolesc Health*. 2020;4(4):299-311.
34. Cooray SD, Boyle JA, Soldatos G, Allotey J, Wang H, Fernandez-Felix BM, et al. Development, validation and clinical utility of a risk prediction model for adverse pregnancy outcomes in women with gestational diabetes: The PeRsonal GDM model. *EClinicalMedicine*. 2022;52:101637.

35. Massaut J, Valles P, Ghismonde A, Jacques CJ, Louis LP, Zakir A, et al. The modified south African triage scale system for mortality prediction in resource-constrained emergency surgical centers: a retrospective cohort study. *BMC Health Serv Res.* 2017;17(1):594.
36. Novakowski SK, Kabajaasi O, Kinshella MW, Pillay Y, Johnson T, Dunsmuir D, et al. Health worker perspectives of Smart Triage, a digital triaging platform for quality improvement at a referral hospital in Uganda: a qualitative analysis. *BMC Pediatr.* 2022;22(1):593.
37. Li ECK, Grays S, Tagoola A, Komugisha C, Nabweteme AM, Ansermino JM, et al. Cost-effectiveness analysis protocol of the Smart Triage program: A point-of-care digital triage platform for pediatric sepsis in Eastern Uganda. *PLoS One.* 2021;16(11):e0260044.



## Figures

Fig 1. ROC curves by age groups

Fig 2. Calibration plots by age groups

Fig 3. Model update for neonates only

Fig 4. ROC curve and calibration plot of updated model for neonates

## **Supporting information**

### **S1 Appendix. Smart Triage Model**

**S1 Figure. Calibration plots for exclusive groups**

**S2 Figure. ROC curves for exclusive groups**

**S3 Figure. 10- fold cross validated receiver operating characteristic curve for internal validation of the updated neonate model**

**S1 Table. Summary of risk stratification into the three triage categories and model performance**

**S2 Table. Comparison of logistic regression**

**S3 Table. Summary of categorical predictor variables stratified across derivation and validation set**

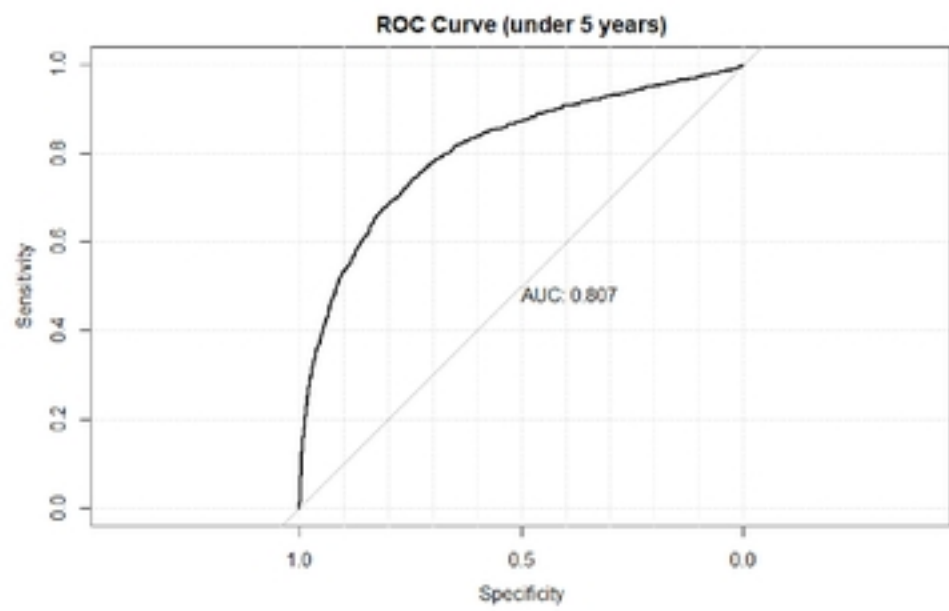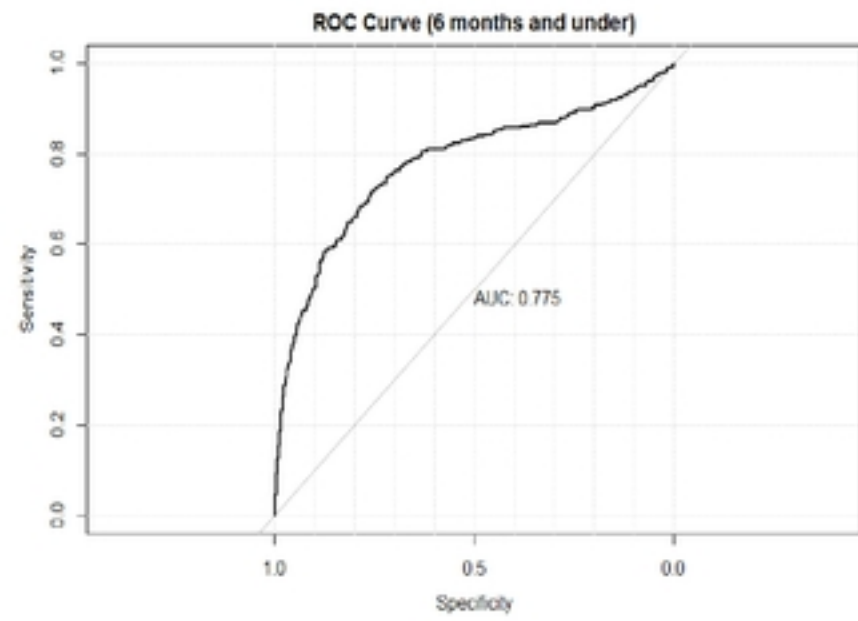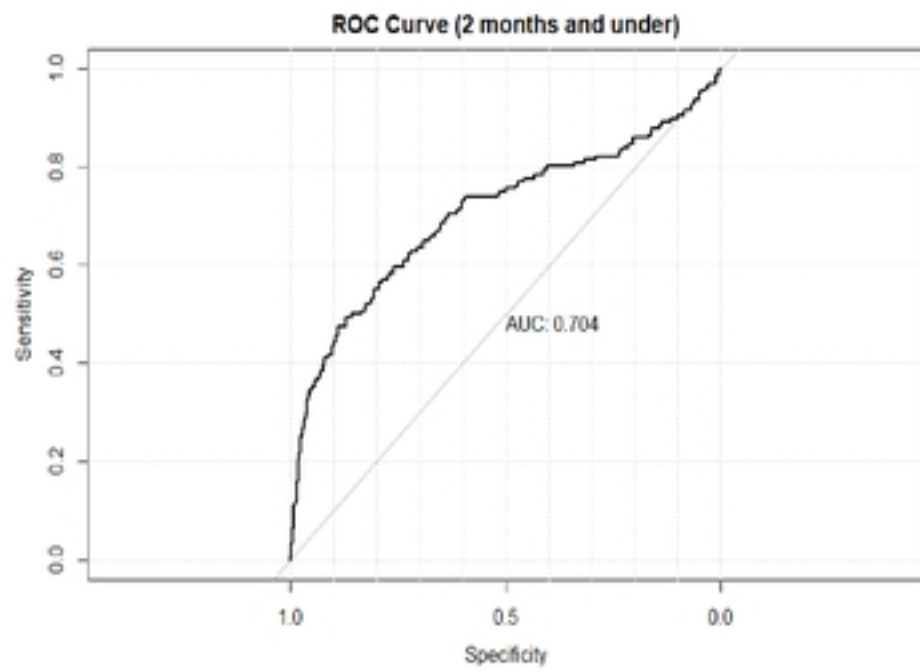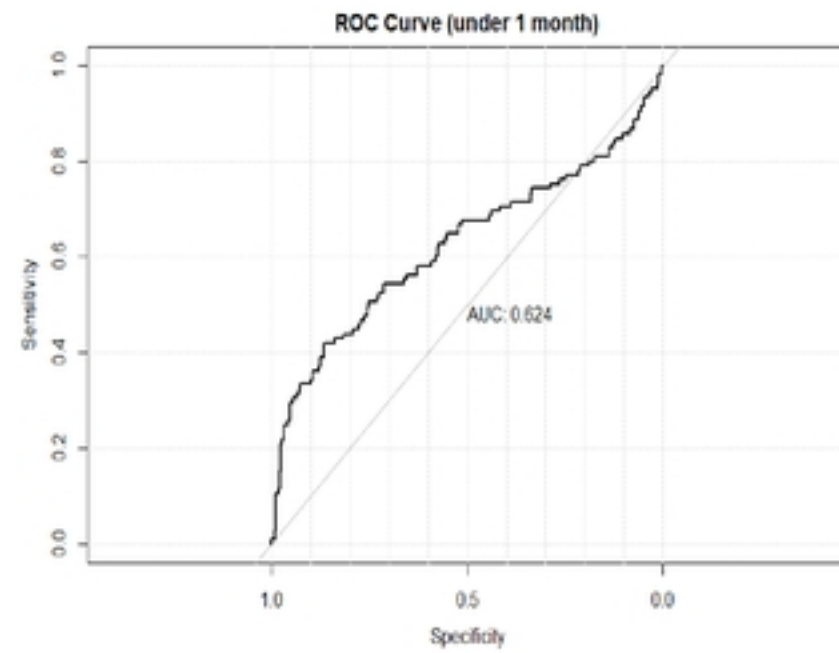

Figure 1. ROC curves by age groups

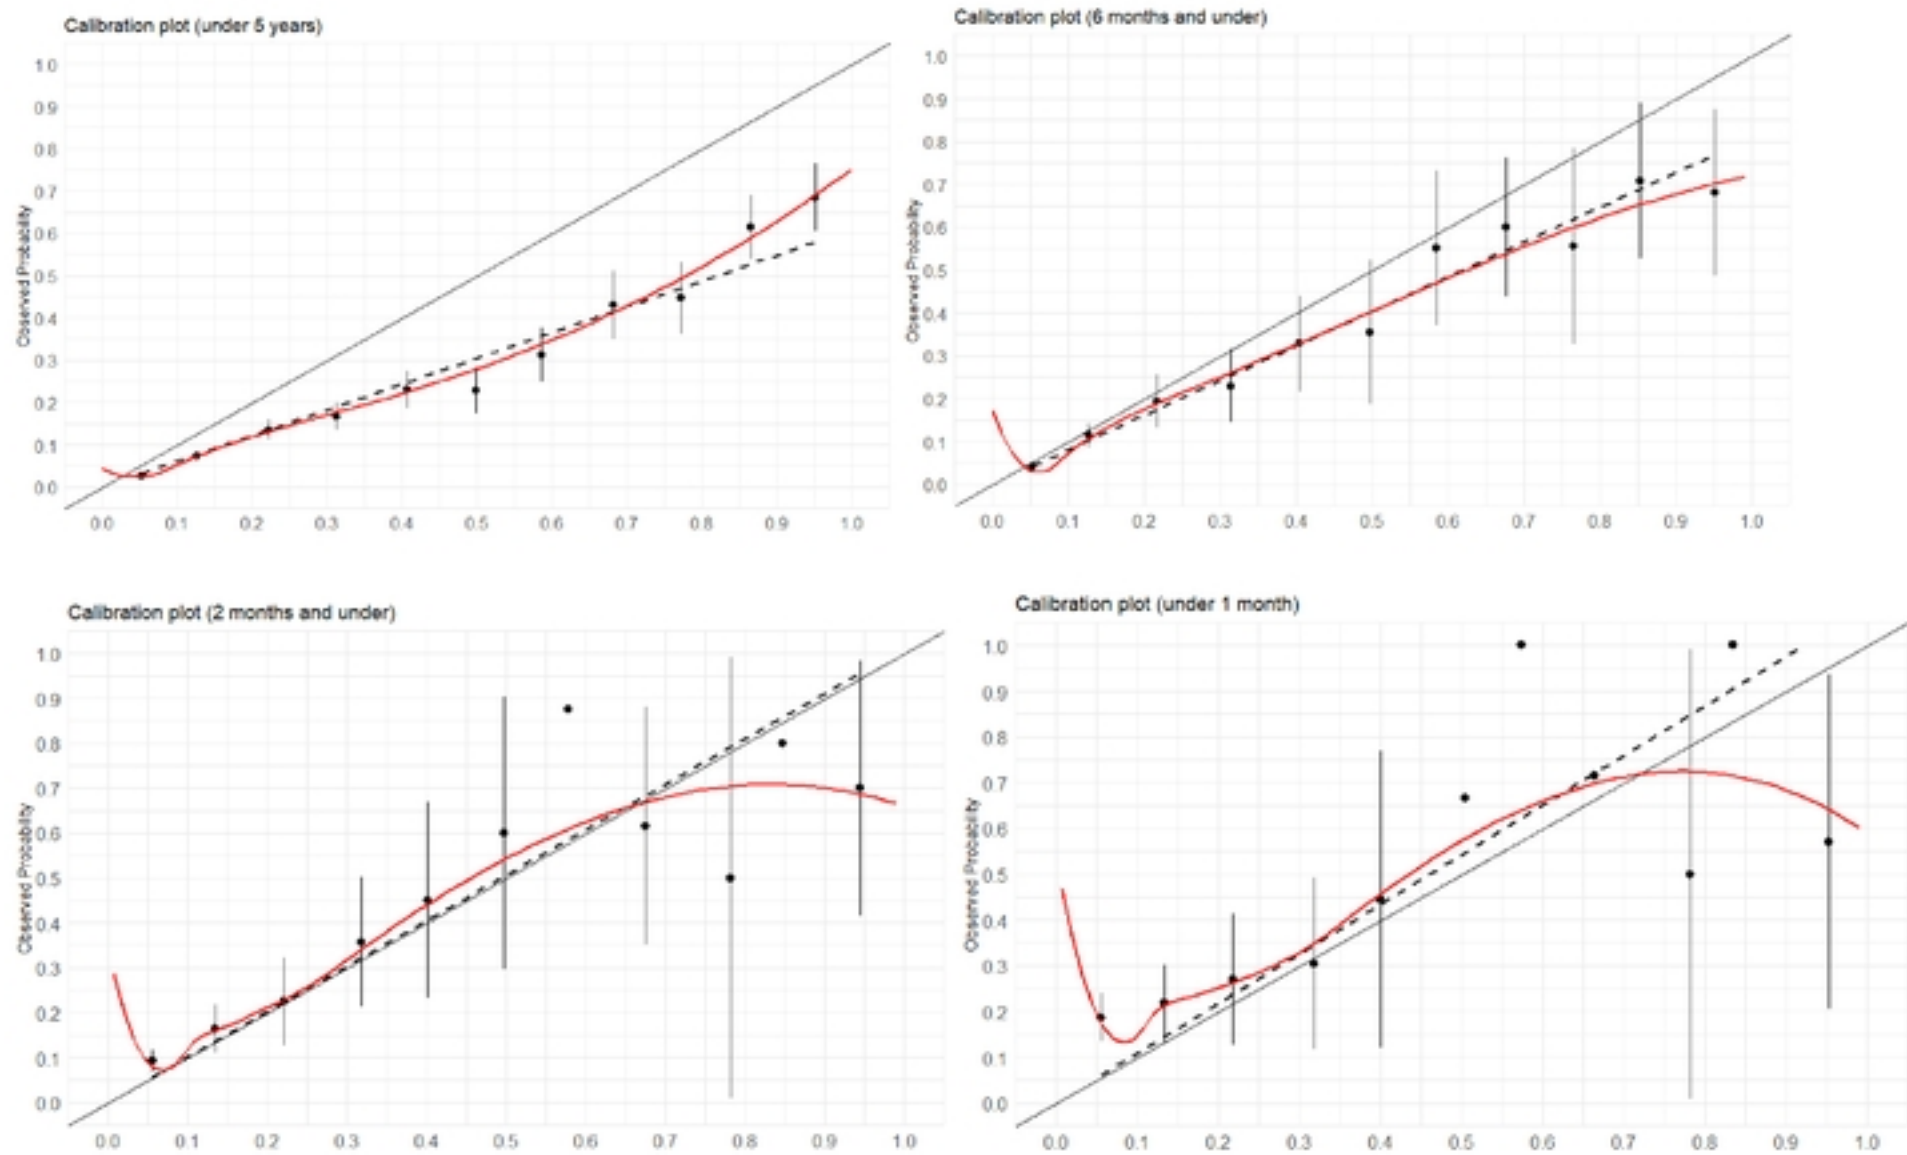

Figure 2. Calibration plots by age groups

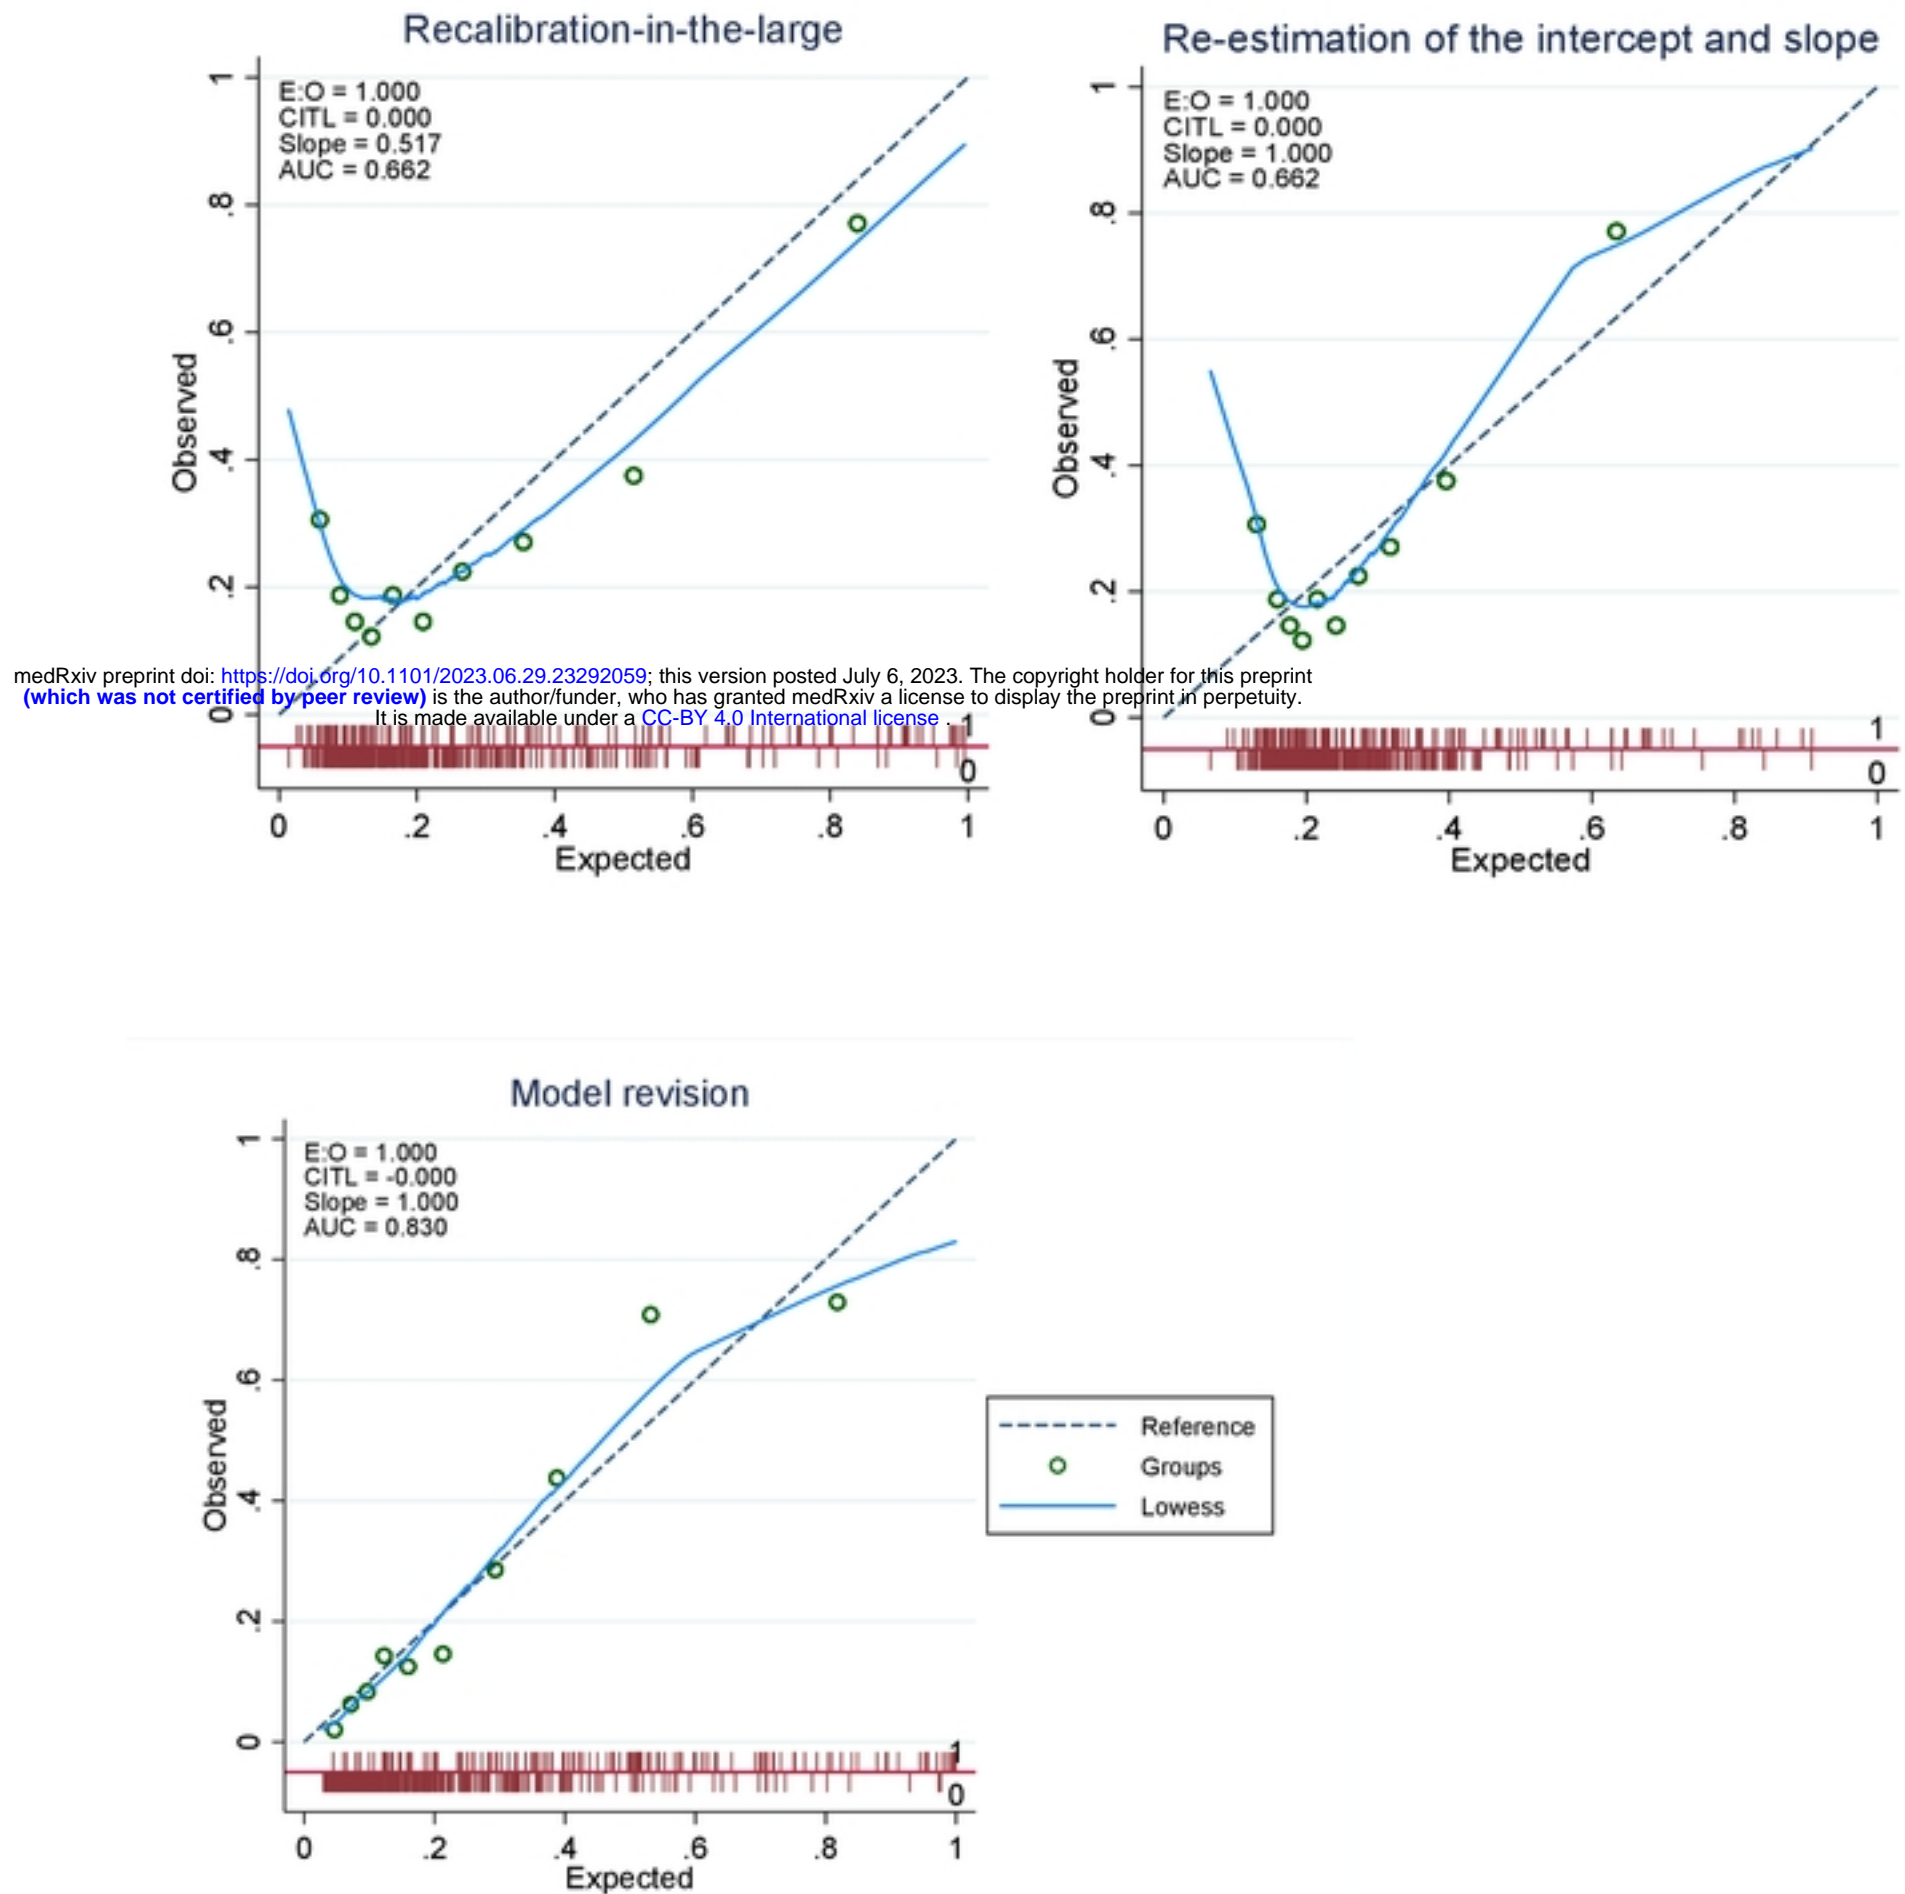

medRxiv preprint doi: <https://doi.org/10.1101/2023.06.29.23292059>; this version posted July 6, 2023. The copyright holder for this preprint (which was not certified by peer review) is the author/funder, who has granted medRxiv a license to display the preprint in perpetuity. It is made available under a [CC-BY 4.0 International license](https://creativecommons.org/licenses/by/4.0/).

Figure 3. Model update for neonates only

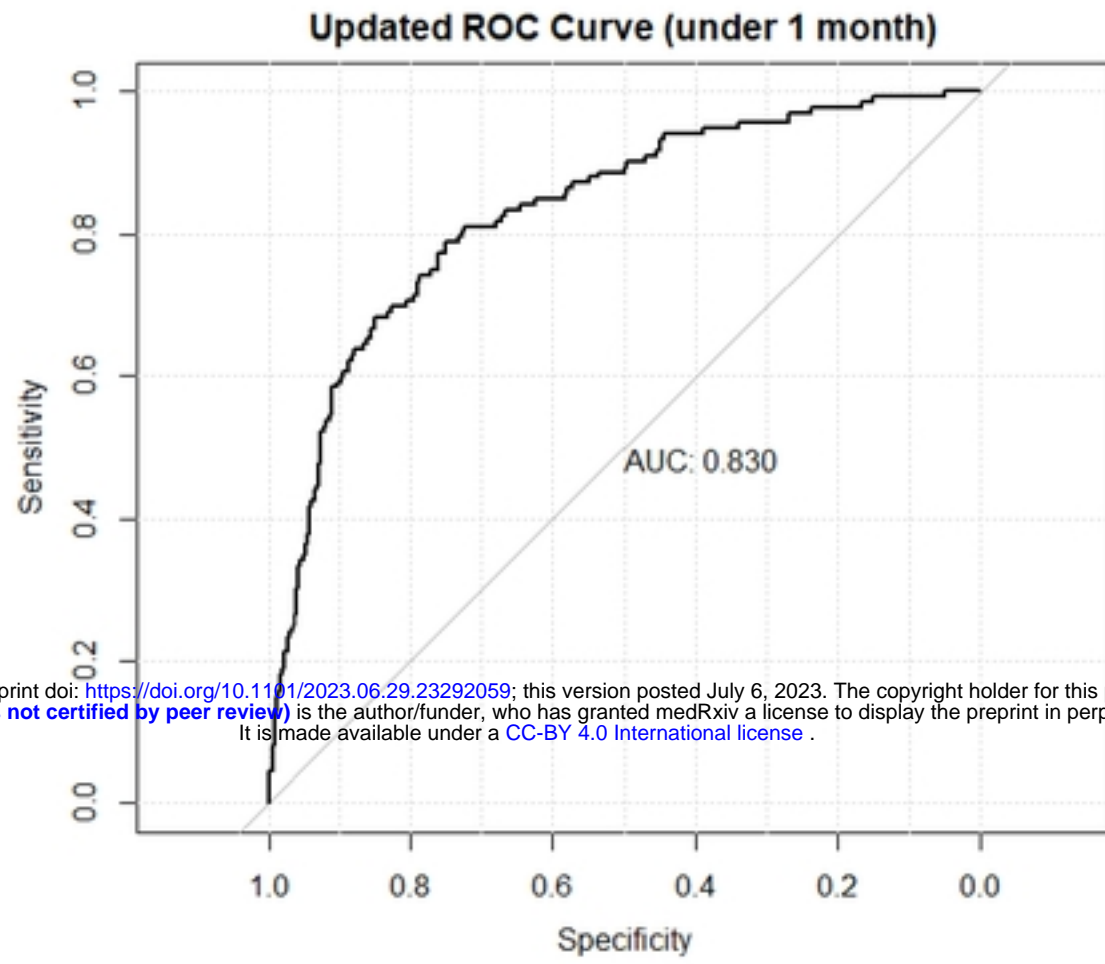

medRxiv preprint doi: <https://doi.org/10.1101/2023.06.29.23292059>; this version posted July 6, 2023. The copyright holder for this preprint (which was not certified by peer review) is the author/funder, who has granted medRxiv a license to display the preprint in perpetuity. It is made available under a [CC-BY 4.0 International license](https://creativecommons.org/licenses/by/4.0/).

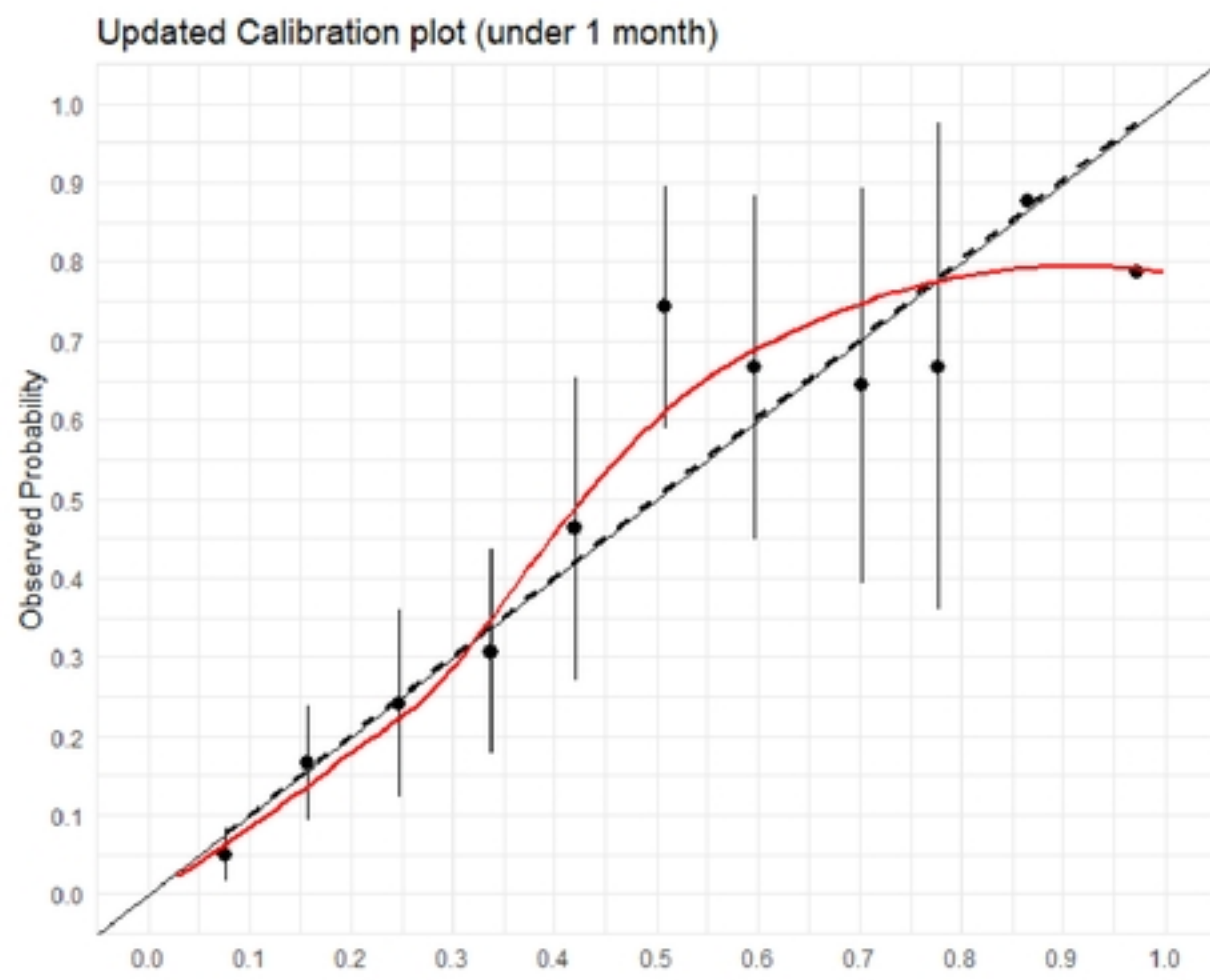

Figure 4. ROC curve and calibration plot of updated model for neonates
